# Supplementary material for: Single Amino Acid Substitution in the Matrix Protein of Rabies Virus Is Associated with Neurovirulence in Mice
Source: MDPI journal article supplement (doi:10.3390/v16050699), 2024-04-28
Supplement: s1 [file s1]

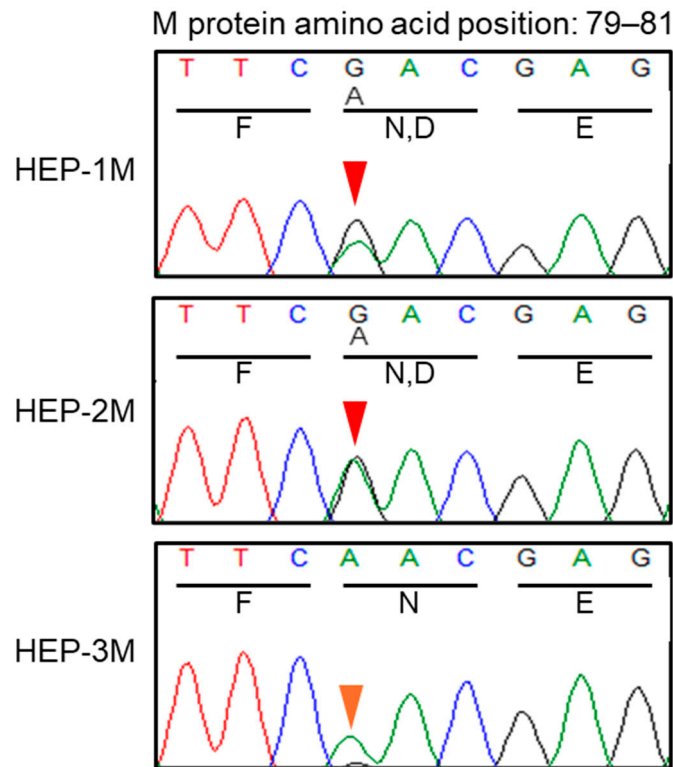

**Supplemental Fig. S1 Comparison of nucleotide and amino acid sequences of original HEP-Flury after propagations in MNA cells.**

The sequences of amino acids position 79 to 81 in the matrix (M) protein of propagated HEP strain after one, two, and three passages into MNA cells (HEP-1M, HEP-2M, and HEP-3M) are shown. Sequences of these strains were determined and compared using GENETYX Ver.15 (GENETYX, Tokyo, Japan) and a Sequence Scanner (Thermo Fisher Scientific, Waltham, MA, USA). At the nucleotide position of 238 (amino acid position 80) in the M protein, red arrowheads indicate a mixture of adenine and guanine, and the orange arrowhead indicates adenine.

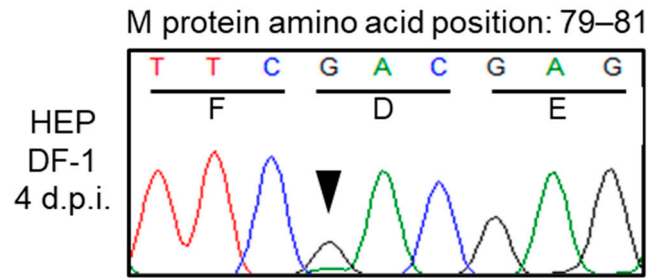

**Supplemental Fig. S2 Nucleotide sequence of original HEP-Flury after propagation in chicken embryo fibroblast cells, DF-1.**

The original HEP-Flury was inoculated to DF-1 cells at a multiplicity of infection (M.O.I.) of 0.05. The sequences were determined from the supernatant of DF-1 cells at 4 days post infection (d.p.i.) and compared using GENETYX Ver.15 (GENETYX, Tokyo, Japan) and a Sequence Scanner (Thermo Fisher Scientific, Waltham, MA, USA). The sequence at amino acid positions 79 to 81 in the matrix (M) protein are shown. Black arrowhead indicates guanine.

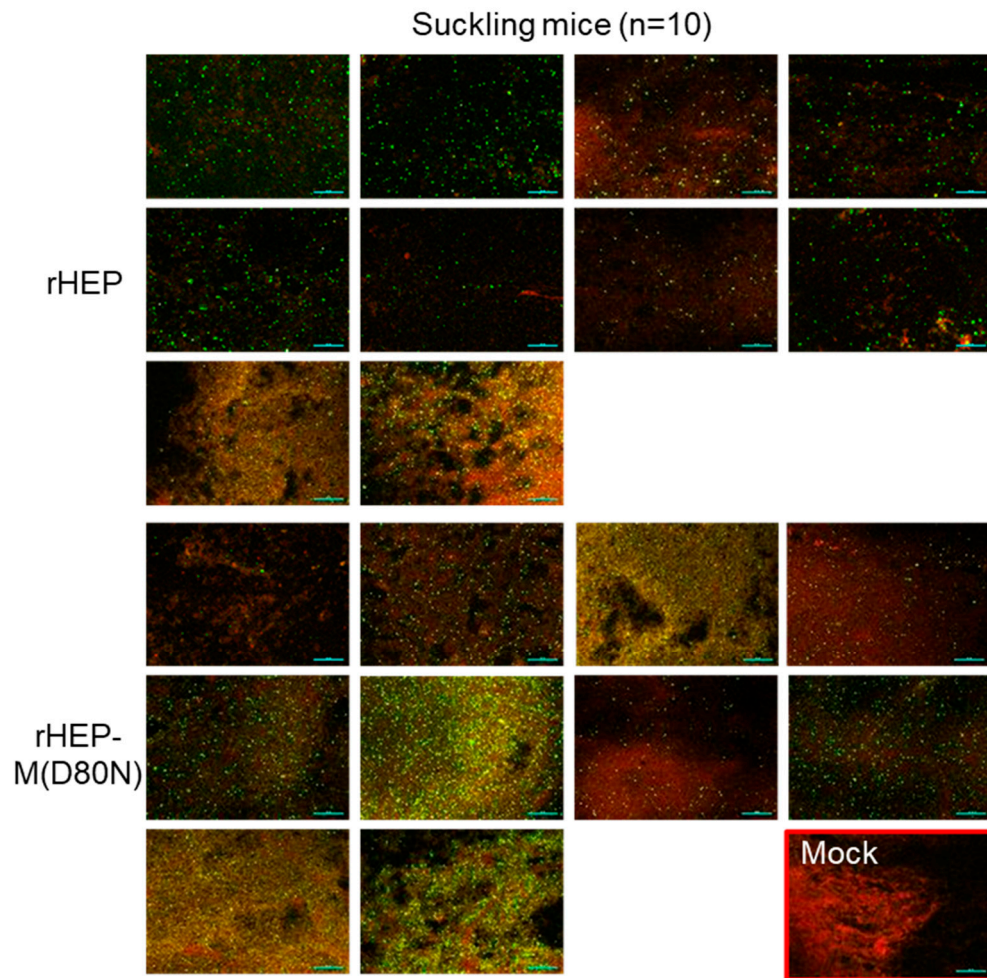

**Supplemental Fig. S3 Direct fluorescent antibody test (DFAT) of brain samples of suckling mice inoculated with rHEP or rHEP-M(D80N).**

Brain tissues were collected from suckling mice inoculated with either virus and applied to the slide with a toothpick. The slides were fixed in 10% formalin supplemented 0.4% Triton X-100 solution, stained with fluorescein isothiocyanate (FITC)-conjugated anti-rabies monoclonal globulin (FUJIREBIO, Tokyo, Japan), and examined under a fluorescence microscope. The stained samples were observed using NIS-Elements D version 5.20.00 imaging software (Nikon, Tokyo, Japan). RABV-positive cells appear green, while negative cells are stained red with Evans Blue. Scale bars, 100  $\mu$ m; magnification,  $\times 40$ . Brain samples from each of ten suckling mice that died at 5-8 d.p.i. after inoculation with either virus are shown.

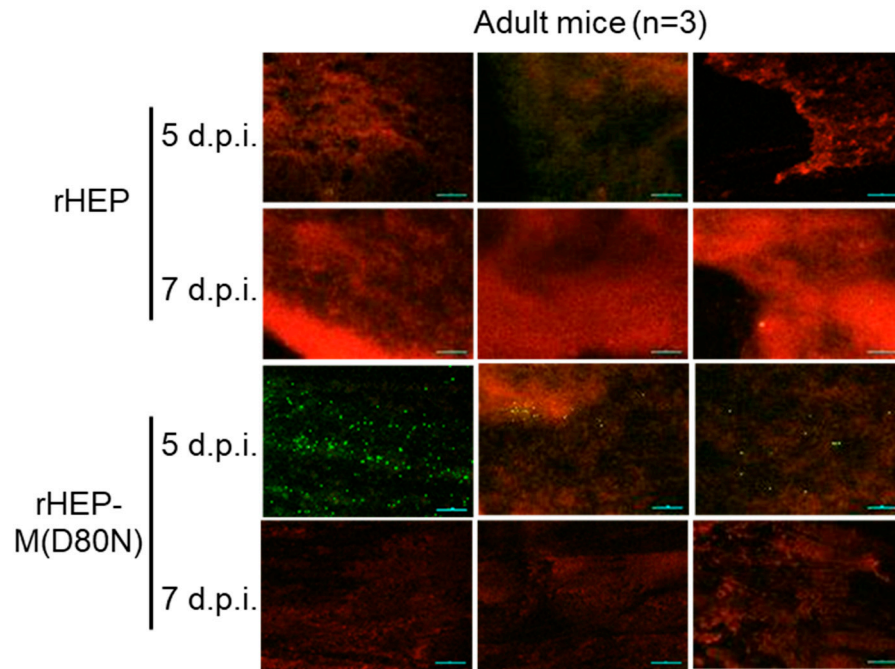

**Supplemental Fig. S4 Direct fluorescent antibody test (DFAT) of brain samples of adult mice inoculated with rHEP or rHEP-M(D80N).**

Brain tissues were collected from adult mice inoculated with either virus and applied to the slide using a toothpick. The slides were fixed in 10% formalin supplemented 0.4% Triton X-100 solution, stained with FITC-conjugated anti-rabies monoclonal globulin, and examined under a fluorescence microscope. The stained samples were observed using NIS-Elements D version 5.20.00 imaging software. RABV-positive cells appear green, while negative cells are stained red with Evans Blue. Scale bars, 100  $\mu$ m; magnification,  $\times 40$ . Brain samples from adult mice inoculated with either virus are shown. Samples were collected from three mice at 5 and 7 d.p.i.

**Supplemental Table S1** Primers used for PCR and construction of the full genome of the infectious clones.

| Primer name   | Orientation | Sequence (5'→3')                                                                                                                             | Position*   |
|---------------|-------------|----------------------------------------------------------------------------------------------------------------------------------------------|-------------|
| RABV 1        | Forward     | ACGCTTAACAACAAAACCAAAGAAG                                                                                                                    | 1–25        |
|               | Reverse     | TGAGCGATCTCAGCCTCYACTGATAG                                                                                                                   | 2121–2096   |
| RABV 2        | Forward     | CTTCCGTTCACTAGGCTTGAGTGGG                                                                                                                    | 934–958     |
|               | Reverse     | GGACCAAGTTTGTCTGGTATCG                                                                                                                       | 3412–3391   |
| RABV 3        | Forward     | CTATGGTCTGACATGTCTCTTCAG                                                                                                                     | 3033–3056   |
|               | Reverse     | GACTTGGAATAGAAATGGGCCAAGTC                                                                                                                   | 5790–5765   |
| RABV 4        | Forward     | TGTCCCCAACATCTTGAGGAACTC                                                                                                                     | 5488–5511   |
|               | Reverse     | CGCATTGGTGGATACTGTAGA                                                                                                                        | 7912–7892   |
| RABV 5        | Forward     | TACTAGCTCAAGGAGACAACCAGGT                                                                                                                    | 7581–7605   |
|               | Reverse     | AGCTGCATGGCGCACCTCTTGATC                                                                                                                     | 10249–10226 |
| RABV 6        | Forward     | CAGCTCAGGGGCTCTTATACTCAATC                                                                                                                   | 9555–9580   |
|               | Reverse     | ACGCTTAACAAATAAACAATAAAGAT                                                                                                                   | 11925–11900 |
| HEP-M_D80N    | Forward     | ATCATTCAACGAGATATACTCTGGGAA                                                                                                                  | 2726–2752   |
|               | Reverse     | ATCTCGTTGAATGATCTCAGAATATGC                                                                                                                  | 2740–2714   |
| Kpn_HamRz_HEP | Forward     | <u>ATAGGTACCTGTTAAGCGTCTGATGAGTCCGTGAGGACGAACTATAGGAAAG</u><br><u>GAATTCCTATAGTCACGCTTAACAACAAAACCAAAGAAGAAGCA*</u>                          | 1–30        |
| Pst_HdvRz_HEP | Reverse     | <u>CGGCTGCAGCGCCCTCCCTTAGCCATCCGAGTGGACGTGCGTCCTCCTTCGGA</u><br><u>TGCCAGGTCGGACCGCGAGGAGGTGGAGATGCCATGCCGACCCACGCTTAA</u><br>CAAATAAACAATA* | 11925–11905 |

Ribozyme sequences are underlined.

\* The positions of the primers for PCR and plasmid construction were defined according to the genomic sequence of the HEP strain.

**Supplemental Table S2** Primers used to construct helper plasmids

| Primer name | Orientation | Sequence (5'→3')           | Position*   |
|-------------|-------------|----------------------------|-------------|
| N protein   | Forward     | ATAGGTACCATGGATGCCGACAAG   | 67–85       |
|             | Reverse     | CGGCTGCAGTTATGAGTCACTCG    | 1423–1410   |
| P protein   | Forward     | ATAGGTACCATGAGCAAGATCTTTG  | 1511–1529   |
|             | Reverse     | CGGCTGCAGTTAGCATGATGTGTAG  | 2408–2392   |
| G protein   | Forward     | ATAGGTACCATGGTTCCTCAGGTTC  | 3318–3333   |
|             | Reverse     | CGGCTGCAGTCACAGTCTGGTCTCG  | 4892–4877   |
| L protein   | Forward     | ATAGGTACCATGCTGGATCCGGGA   | 5411–5425   |
|             | Reverse     | CGGCTGCAGTTACAAACAACCTGTAG | 11794–11779 |

\* The positions of the primers for PCR and plasmid construction were defined according to the genomic sequence of the HEP strain.
